# Supplementary material for: A Single Pair of Serotonergic Neurons Counteracts Serotonergic Inhibition of Ethanol Attraction in Drosophila
Source: PubMed Central journal article supplement (PMC5147910; doi:10.1371/journal.pone.0167518), 2016-12-09
Supplement: pone.0167518.s001.pdf [file pone.0167518.s001.pdf]

**Tph-Gal4****Sert3-Gal4****Trh-Gal4**

| <i>Head</i>           | 5-HT ± STDEV | GFP ± STDEV | Merge ± STDEV | n  | <i>Head</i>           | 5-HT ± STDEV | GFP ± STDEV | Merge ± STDEV | n  | <i>Head</i>           | 5-HT ± STDEV | GFP ± STDEV | Merge ± STDEV | n  |
|-----------------------|--------------|-------------|---------------|----|-----------------------|--------------|-------------|---------------|----|-----------------------|--------------|-------------|---------------|----|
| SP1                   | 3.0 ± 0.0    | 3.7 ± 0.5   | 2.1 ± 0.3     | 21 | SP1                   | 3.0 ± 0.2    | 0.0         | 0.0           | 23 | SP1                   | 3.0 ± 0.0    | 3.5 ± 0.7   | 3.0 ± 0.2     | 24 |
| SP2                   | 5.2 ± 0.7    | 4.9 ± 1.0   | 2.5 ± 0.7     | 19 | SP2                   | 5.2 ± 0.5    | 0.0         | 0.0           | 19 | SP2                   | 5.2 ± 0.6    | 4.7 ± 0.9   | 3.6 ± 0.6     | 22 |
| IP                    | 7.5 ± 0.8    | 8.1 ± 1.3   | 4.6 ± 0.8     | 20 | IP                    | 7.5 ± 0.7    | 1.3 ± 0.5   | 1.3 ± 0.5     | 19 | IP                    | 6.9 ± 0.7    | 7.1 ± 1.0   | 5.2 ± 1.0     | 19 |
| LP1                   | 2.0 ± 0.0    | 5.4 ± 0.8   | 2.0 ± 0.0     | 14 | LP1                   | 2.0 ± 0.2    | 1.3 ± 0.5   | 1.3 ± 0.5     | 19 | LP1                   | 2.0 ± 0.0    | 9.6 ± 1.7   | 2.0 ± 0.0     | 22 |
| LP2                   | 9.8 ± 1.1    | 12.9 ± 1.9  | 2.8 ± 0.8     | 16 | LP2                   | 9.8 ± 1.4    | 0.0         | 0.0           | 25 | LP2                   | 9.5 ± 2.5    | 12.2 ± 2.0  | 6.7 ± 2.0     | 27 |
| LP3                   | 2.8 ± 0.7    | 16.2 ± 1.7  | 1.6 ± 1.0     | 9  | LP3                   | 2.2 ± 0.4    | 0.0         | 0.0           | 6  | LP3                   | 2.7 ± 0.6    | 1.0 ± 1.2   | 0.3 ± 0.5     | 16 |
| SE1                   | 4.1 ± 0.3    | 4.8 ± 0.9   | 2.2 ± 0.7     | 14 | SE1                   | 4.0 ± 0.4    | 1.4 ± 0.5   | 1.2 ± 0.5     | 14 | SE1                   | 4.1 ± 0.3    | 4.1 ± 0.4   | 4.1 ± 0.3     | 28 |
| SE2                   | 2.1 ± 0.3    | 2.1 ± 0.3   | 2.0 ± 0.4     | 13 | SE2                   | 2.2 ± 0.4    | 0.0         | 0.0           | 22 | SE2                   | 2.0 ± 0.2    | 2.0 ± 0.5   | 1.9 ± 0.5     | 22 |
| SE3                   | 3.0 ± 0.0    | 7.2 ± 0.9   | 3.0 ± 0.0     | 17 | SE3                   | 3.0 ± 0.2    | 0.0         | 0.0           | 30 | SE3                   | 3.0 ± 0.0    | 3.0 ± 0.0   | 3.0 ± 0.0     | 23 |
| AP                    | 2.9 ± 0.3    | 6.0 ± 2.4   | 1.0 ± 0.0     | 11 | AP                    | 3.0 ± 0.2    | 0.0         | 0.0           | 24 | AP                    | 2.9 ± 0.3    | 3.7 ± 1.3   | 2.1 ± 0.5     | 26 |
| DP                    | 1.0 ± 0.0    | 0.0         | 0.0           | 16 | DP                    | 1.0 ± 0.0    | 0.0         | 0.0           | 27 | DP                    | 1.0 ± 0.0    | 1.0 ± 0.0   | 1.0 ± 0.0     | 15 |
| CSD                   | 1.0 ± 0.0    | 0.0         | 0.0           | 17 | CSD                   | 1.0 ± 0.0    | 0.0         | 0.0           | 34 | CSD                   | 1.0 ± 0.0    | 1.0 ± 0.0   | 1.0 ± 0.0     | 21 |
| <b><i>Thorax</i></b>  |              |             |               |    | <b><i>Thorax</i></b>  |              |             |               |    | <b><i>Thorax</i></b>  |              |             |               |    |
| Pro                   | 2.2 ± 0.4    | 2.9 ± 0.3   | 2.2 ± 0.4     | 14 | Pro                   | 2.2 ± 0.0    | 0.0         | 0.0           | 12 | Pro                   | 2.2 ± 0.4    | 2.3 ± 0.5   | 2.0 ± 0.0     | 12 |
| Meso                  | 2.1 ± 0.3    | 2.9 ± 0.3   | 2.1 ± 0.3     | 16 | Meso                  | 1.9 ± 0.3    | 0.0         | 0.0           | 10 | Meso                  | 2.0 ± 0.0    | 3.0 ± 0.0   | 2.0 ± 0.0     | 9  |
| Meta                  | 1.1 ± 0.3    | 2.6 ± 0.5   | 1.1 ± 0.3     | 16 | Meta                  | 1.2 ± 0.4    | 0.0         | 0.0           | 16 | Meta                  | 1.1 ± 0.4    | 2.2 ± 0.4   | 1.1 ± 0.4     | 14 |
| <b><i>Abdomen</i></b> |              |             |               |    | <b><i>Abdomen</i></b> |              |             |               |    | <b><i>Abdomen</i></b> |              |             |               |    |
| Abdm                  | 16.5 ± 1.2   | 13.4 ± 2.3  | 11.0 ± 2.4    | 14 | Abdm                  | 16.5 ± 1.6   | 0.0         | 0.0           | 14 | Abdm                  | 16.5 ± 1.6   | 17.9 ± 1.0  | 16.1 ± 1.0    | 13 |
