# Supplementary material for: A Single Pair of Serotonergic Neurons Counteracts Serotonergic Inhibition of Ethanol Attraction in Drosophila
Source: PubMed Central journal article supplement (PMC5147910; doi:10.1371/journal.pone.0167518), 2016-12-09
Supplement: pone.0167518.s002.pdf [file pone.0167518.s002.pdf]

**Table S2: Original data related to Fig. 1, Fig. 2, Fig. 3, Fig. 4 and Fig. 5**

| <b>Fig. 1b</b>                                             |             |            |          |                  |
|------------------------------------------------------------|-------------|------------|----------|------------------|
| <b>Genotype</b>                                            | <b>Mean</b> | <b>SEM</b> | <b>N</b> | <b>Condition</b> |
| <i>w<sup>1118</sup></i>                                    | 0.42        | 0.06       | 26       | Vehicle          |
| <i>w<sup>1118</sup></i>                                    | 0.33        | 0.07       | 28       | 5mM 5HTP         |
| <i>w<sup>1118</sup></i>                                    | 0.14        | 0.08       | 30       | 45mM 5HTP        |
| <b>Fig. 1d</b>                                             |             |            |          |                  |
| <b>Genotype</b>                                            | <b>Mean</b> | <b>SEM</b> | <b>N</b> |                  |
| <i>w<sup>1118</sup>; Tph-GAL4</i>                          | 0.49        | 0.08       | 33       |                  |
| <i>w<sup>1118</sup>; UAS-Sert<sup>DN</sup>-GFP</i>         | 0.51        | 0.05       | 28       |                  |
| <i>w<sup>1118</sup>; Tph-GAL4, UAS-Sert<sup>DN</sup></i>   | 0.21        | 0.05       | 35       |                  |
| <b>Fig. 1f</b>                                             |             |            |          |                  |
| <b>Genotype</b>                                            | <b>Mean</b> | <b>SEM</b> | <b>N</b> |                  |
| <i>w<sup>1118</sup>; Tph-GAL4</i>                          | 0.49        | 0.05       | 28       |                  |
| <i>w<sup>1118</sup>; UAS-Sert<sup>DN</sup></i>             | 0.50        | 0.04       | 35       |                  |
| <i>w<sup>1118</sup>; Tph-GAL4, UAS-Sert<sup>DN</sup></i>   | 0.20        | 0.05       | 32       |                  |
| <b>Fig. 2d</b>                                             |             |            |          |                  |
| <b>Genotype</b>                                            | <b>Mean</b> | <b>SEM</b> | <b>N</b> |                  |
| <i>w<sup>1118</sup>; Sert3-GAL4</i>                        | 0.52        | 0.06       | 27       |                  |
| <i>w<sup>1118</sup>; UAS-Sert<sup>DN</sup></i>             | 0.53        | 0.05       | 15       |                  |
| <i>w<sup>1118</sup>; Sert3-GAL4, UAS-Sert<sup>DN</sup></i> | 0.22        | 0.06       | 21       |                  |
| <b>Fig. 3b</b>                                             |             |            |          |                  |
| <b>Genotype</b>                                            | <b>Mean</b> | <b>SEM</b> | <b>N</b> | <b>Condition</b> |
| <i>NorpA1; Sert3-GAL4; UAS-ChR2</i>                        | -0.02       | 0.12       | 25       | Vehicle          |
| <i>NorpA1; Sert3-GAL4; UAS-ChR2</i>                        | -0.12       | 0.10       | 26       | Retinal          |
| <b>Fig. 3c</b>                                             |             |            |          |                  |
| <b>Genotype</b>                                            | <b>Mean</b> | <b>SEM</b> | <b>N</b> | <b>Condition</b> |
| <i>NorpA1; Sert3-GAL4; UAS-ChR2</i>                        | 0.21        | 0,06       | 30       | Vehicle          |
| <i>NorpA1; Sert3-GAL4; UAS-ChR2</i>                        | -0.09       | 0,06       | 30       | Retinal          |
| <b>Fig. 4a</b>                                             |             |            |          |                  |
| <b>Genotype</b>                                            | <b>Mean</b> | <b>SEM</b> | <b>N</b> |                  |
| <i>w<sup>1118</sup>; ; Trh-GAL4</i>                        | 0.49        | 0.04       | 30       |                  |

|                                                 |             |            |          |                   |
|-------------------------------------------------|-------------|------------|----------|-------------------|
| $w^{1118}; UAS-Sert^{DN}$                       | 0.35        | 0.06       | 31       |                   |
| $w^{1118}; UAS-Sert^{DN}; Trh-GAL4$             | 0.33        | 0.05       | 31       |                   |
| <b>Fig. 4b</b>                                  |             |            |          |                   |
| <b>Genotype</b>                                 | <b>Mean</b> | <b>SEM</b> | <b>N</b> |                   |
| $w^{1118}; Sert3-GAL4; Trh-GAL4$                | 0.52        | 0.07       | 32       |                   |
| $w^{1118}; UAS-Sert^{DN}$                       | 0.54        | 0.08       | 32       |                   |
| $w^{1118}; Sert3-GAL4, UAS-Sert^{DN}; Trh-GAL4$ | 0.60        | 0.09       | 31       |                   |
| <b>Fig. 4c</b>                                  |             |            |          |                   |
| <b>Genotype</b>                                 | <b>Mean</b> | <b>SEM</b> | <b>N</b> |                   |
| $w^{1118}; Sert3-GAL4; RN2-GAL4$                | 0.57        | 0.11       | 29       |                   |
| $w^{1118}; UAS-Sert^{DN}$                       | 0.58        | 0.05       | 33       |                   |
| $w^{1118}; Sert3-GAL4, UAS-Sert^{DN}; RN2-GAL4$ | 0.58        | 0.12       | 20       |                   |
| <b>Fig. 4d</b>                                  |             |            |          |                   |
| <b>Genotype</b>                                 | <b>Mean</b> | <b>SEM</b> | <b>N</b> |                   |
| $w^{1118}; ;RN2-GAL4$                           | 0.33        | 0.07       | 45       |                   |
| $w^{1118}; UAS-Sert^{DN}$                       | 0.24        | 0.07       | 58       |                   |
| $w^{1118}; UAS-Sert^{DN}; RN2-GAL4$             | 0.40        | 0.07       | 50       |                   |
| <b>Fig. 5a</b>                                  |             |            |          |                   |
| <b>Genotype</b>                                 | <b>Mean</b> | <b>SEM</b> | <b>N</b> | <b>Conditions</b> |
| $w^{1118}; ;RN2-GAL4$                           | 0.06        | 0.07       | 28       | 1% EtOH           |
| $w^{1118}; UAS-Sert^{DN}$                       | 0.05        | 0.08       | 27       |                   |
| $w^{1118}; UAS-Sert^{DN}; RN2-GAL4$             | 0.04        | 0.08       | 26       |                   |
| $w^{1118}; ;RN2-GAL4$                           | 0.33        | 0.07       | 25       | 3% EtOH           |
| $w^{1118}; UAS-Sert^{DN}$                       | 0.22        | 0.08       | 25       |                   |
| $w^{1118}; UAS-Sert^{DN}; RN2-GAL4$             | 0.20        | 0.08       | 20       |                   |
| $w^{1118}; ;RN2-GAL4$                           | 0.29        | 0.06       | 32       | 5% EtOH           |
| $w^{1118}; UAS-Sert^{DN}$                       | 0.32        | 0.07       | 26       |                   |
| $w^{1118}; UAS-Sert^{DN}; RN2-GAL4$             | 0.22        | 0.08       | 27       |                   |
| $w^{1118}; ;RN2-GAL4$                           | 0.27        | 0.06       | 34       | 10% EtOH          |
| $w^{1118}; UAS-Sert^{DN}$                       | 0.26        | 0.05       | 33       |                   |
| $w^{1118}; UAS-Sert^{DN}; RN2-GAL4$             | 0.44        | 0.06       | 34       |                   |

|                                    |       |      |    |          |
|------------------------------------|-------|------|----|----------|
| $w^{118}; ;RN2-GAL4$               | 0.02  | 0.05 | 31 | 15% EtOH |
| $w^{118}; UAS-Sert^{DN}$           | 0.06  | 0.05 | 32 |          |
| $w^{118}; UAS-Sert^{DN}; RN2-GAL4$ | 0.21  | 0.05 | 33 |          |
|                                    |       |      |    |          |
| $w^{118}; ;RN2-GAL4$               | -0.27 | 0.07 | 25 | 23% EtOH |
| $w^{118}; UAS-Sert^{DN}$           | -0.28 | 0.06 | 23 |          |
| $w^{118}; UAS-Sert^{DN}; RN2-GAL4$ | -0.02 | 0.07 | 22 |          |
