# Supplementary material for: A Single Pair of Serotonergic Neurons Counteracts Serotonergic Inhibition of Ethanol Attraction in Drosophila
Source: PubMed Central journal article supplement (PMC5147910; doi:10.1371/journal.pone.0167518), 2016-12-09
Supplement: pone.0167518.s006.pdf [file pone.0167518.s006.pdf]

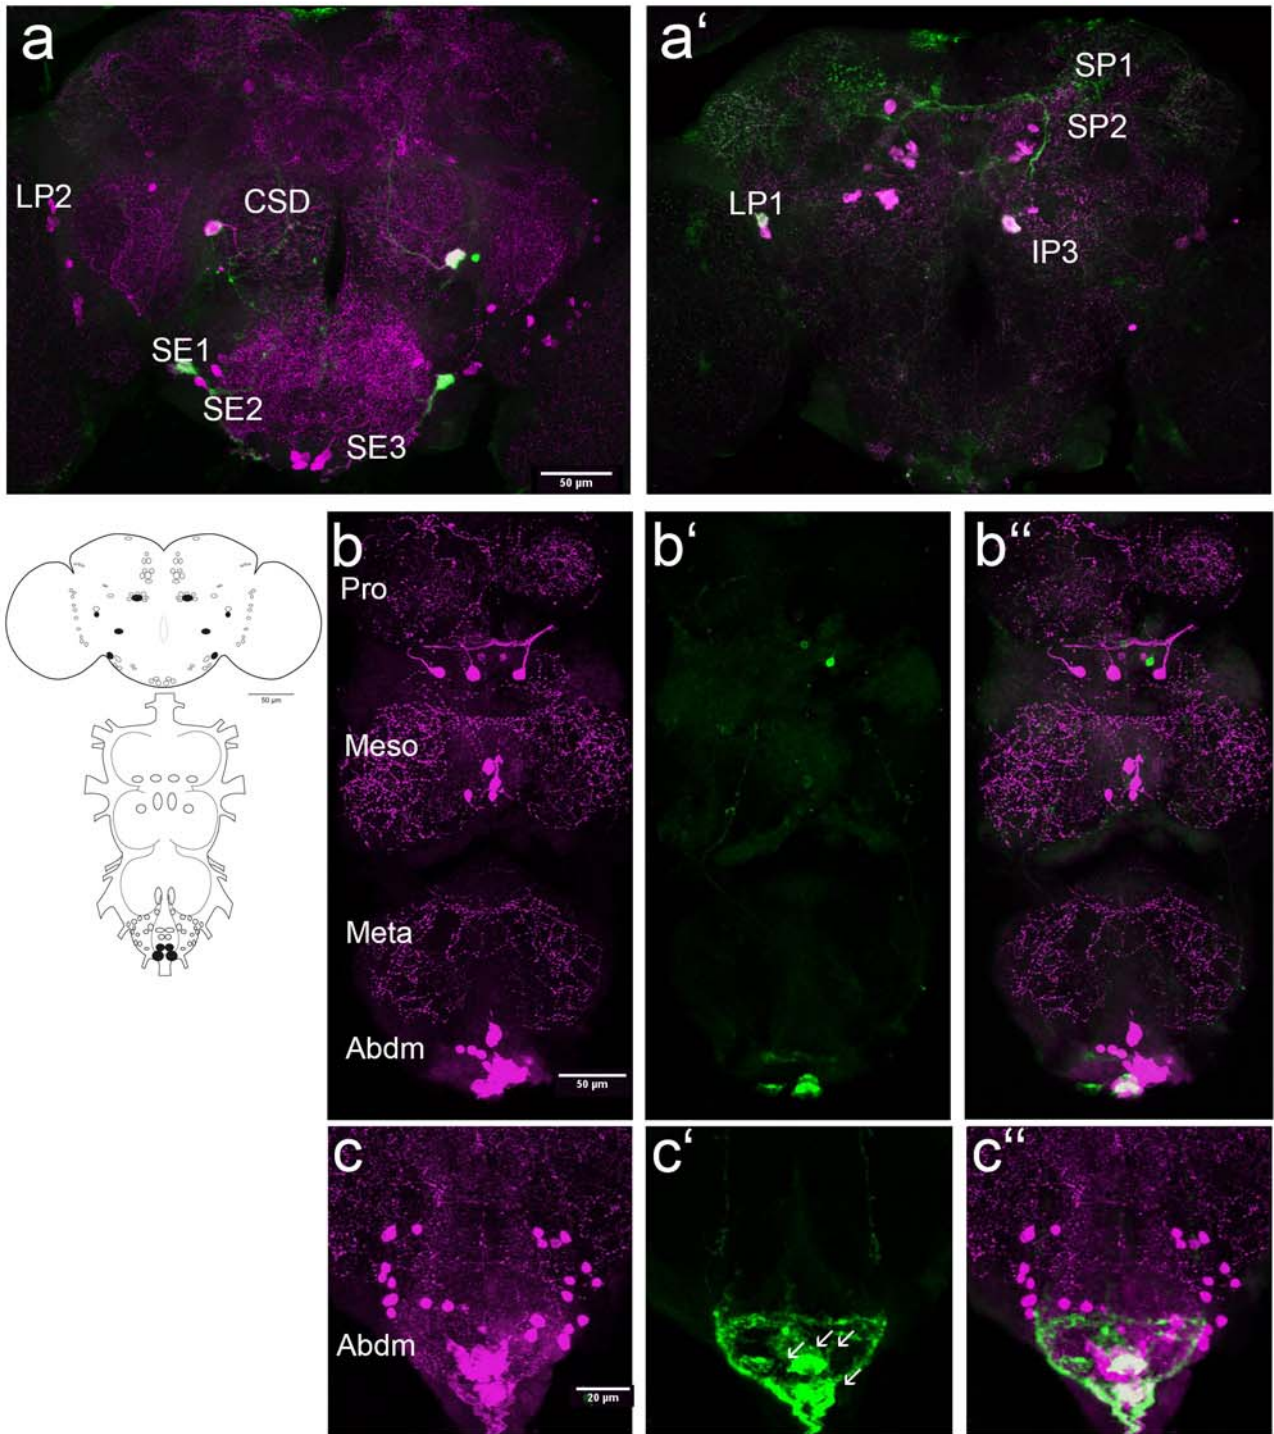

Figure-S4-Scholz
